# Supplementary material for: Life experience rather than domestication accounts for dogs’ increased oxytocin release during social contact with humans
Source: PubMed Central journal article supplement (PMC8277847; doi:10.1038/s41598-021-93922-1), 2021-07-13
Supplement: 41598_2021_93922_MOESM7_ESM.pdf [file 41598_2021_93922_MOESM7_ESM.pdf]

27 **Supplementary Text**

28

29 **Detailed description of all statistical models**

30

31 Experiment 1: Pack-living dogs and wolves

32

33 *1. Effect of species and condition on urinary oxytocin metabolite concentrations*

34 To examine if domestication has altered dogs' urinary OTM concentrations in response to social  
35 interactions with humans, we tested whether test condition affected urinary OTM concentrations  
36 differently in pack-living dogs and wolves. To this end, we fitted a Linear Mixed Model (LMM)  
37 with Gaussian error structure. The response variable (urinary OTM pg/ml SG) was log  
38 transformed to obtain normally distributed and homogenous residuals. The test predictor was the  
39 interaction between condition (factor with four levels: 'bonded human', 'familiar human', 'food  
40 control', 'baseline') and species (factor with two levels: 'wolf', 'dog'), and their respective main  
41 effects. To account for species-specific sex differences we included the sex by species  
42 interaction. Feeding status (factor with two levels, 'fed' and 'not fed' the day before testing) and  
43 reproductive phase (factor with two levels: 'anestrus', 'diestrus'; testing during proestrus and  
44 estrus was avoided) were inserted as control variables (reproductive phase was subsequently  
45 dropped from further OTM models because it did not affect OTM concentrations). Random  
46 effects of subject, pack, and assay plate were included to account for repeated sampling and  
47 variation across packs and plates.

48

49 *2. Effect of species and relationship strength on body contact seeking and self-directed*  
50 *behaviors*

51 First, to investigate whether relationship strength positively affected body contact seeking in  
52 dogs and wolves, we fitted a beta model using the R package glmmTMB to a subset of the data  
53 comprising the social interaction conditions. The response variable was the normalized duration  
54 (proportion of interaction time the animal was visible on camera) of interaction time spent in  
55 body contact with the human partner. The test predictor was the interaction between relationship  
56 strength (i.e., factor with two levels: 'bonded' and 'familiar') and species. Sex was included as a  
57 control predictor and subject, pack, and interaction partner identity were included as random  
58 effects. To compare the species-specific variability in contact seeking behavior of dogs and  
59 wolves, we calculated the coefficients of variation (CV) using the R package cvequality.

60

61 To test whether self-directed behaviors (sum of yawning, lip licking, head/body shakes) differed  
62 between dogs and wolves, according to relationship strength of the interaction partner, and  
63 whether they were associated with body contact, we fitted a generalized linear mixed model  
64 (GLMM) with Poisson error distribution. The test predictor was the three-way interaction  
65 between relationship strength (i.e., factor with two levels: 'bonded' and 'familiar'), species, and  
66 normalized duration spent in body contact. Sex was included as a control predictor and subject,  
67 pack, and interaction partner identity were included as random effects. Time in sight was  
68 included as an offset term to account for small differences in the durations that the animals were  
69 visible on camera.

70

71 3. *Effect of species, relationship strength, and body contact on urinary oxytocin metabolite*  
72 *concentrations*

73 We fitted another model to specifically investigate the effects of species, relationship strength,  
74 and body contact on urinary OTM concentrations following the interaction tests. The response  
75 variable was urinary OTM (pg/ml SG) which was log transformed (see above), and the test  
76 predictor was the three-way-interaction of species, proportion time spent in body contact, and  
77 relationship strength (i.e., factor with two levels: ‘bonded’ and ‘familiar’). Control predictors  
78 were feeding status, the interaction between species and sex, and the frequency of self-directed  
79 behaviors (SDBs; sum of lips licking, yawning, body shaking divided by seconds in sight)  
80 performed by the animals during the interaction tests and their subsequent urinary GCM  
81 concentrations (co-variate, z-transformed) as a proxy for stress/arousal. Basal OTM  
82 concentrations (i.e., OTM concentrations on resting days where no tests took place; ‘baseline’  
83 samples) were included as a co-variate to control for individual variation in OT system activity  
84 (z-transformed). Random effects of subject, pack, partner identity, and assay plate were included.  
85

86 4. *Effect of species, relationship strength, and body contact on urinary glucocorticoid*  
87 *metabolite concentrations*

88 To test the link between body contact, relationship strength, and urinary GCM concentrations in  
89 dogs and wolves, we fitted one more LMM. The response variable was urinary GCM (ng/ml SG)  
90 which was log transformed (see above), and the test predictor was the three-way-interaction of  
91 species, proportion time spent in body contact, and relationship strength (factor with two levels,  
92 ‘bonded’ and ‘familiar’). We controlled for feeding status, reproductive phase, and the  
93 interaction between species and sex, as these factors have been shown to affect GCM  
94 concentrations in a previous study in this population (63). The frequency of SDBs (i.e., sum of  
95 lips licking, yawning, body shaking divided by seconds in sight) performed by the animals  
96 during the interaction tests was included as a co-variate. Baseline GCM concentrations were  
97 included to account for individual differences (z-transformed). Random effects of subject, pack,  
98 and partner identity were included.  
99

100

101 Humans

102

103 1. *Effect of species, relationship strength, and condition on human urinary oxytocin*  
104 *metabolite concentrations*

105

106 To investigate urinary OTM concentrations in the human participants, we fitted a LMM with log  
107 transformed OTM concentrations as the response variable, and a four-way interaction between  
108 condition (factor with two levels: ‘social interaction’ and ‘control’), species (‘dog’, ‘wolf’),  
109 relationship strength (‘bonded (hand raiser)’, ‘familiar’), and time of sample (‘pre’, ‘post’-  
110 testing). Random effects of subject, animal partner, dyad, and plate were included.  
111

111

112

113

114

115 Experiment 2: Pet dogs

116

117 *1. Effect of relationship strength on body contact seeking and self-directed behaviors*

118

119 To first examine if relationship strength (i.e., factor with two levels: 'owner' and 'familiar')  
120 affected time spent in body contact in pet dogs, we fitted a beta model (package glmTMBB)  
121 analogous to the one in the pack-living animals. We controlled for sex (factor with three levels:  
122 'male', 'female', 'castrated/spayed') and the presence of a fence (factor with two levels, 'fence  
123 present' and 'no fence present') between the human interaction partner and the dog. Random  
124 effects of subject and partner identity were included. To investigate the effect of relationship  
125 strength and body contact on the sum of SDBs in pet dogs, we fitted a GLMM with Poisson error  
126 distribution, analogous to the one in the pack animals (see above). We included the interaction  
127 between relationship strength of the partner and time spent in body contact as test predictor, sex  
128 and fence as control predictors, and random effects of subject and partner identity. Time in sight  
129 was included as an offset term to account for differences in visibility on camera.

130

131 *2. Effect of relationship strength and body contact on urinary oxytocin and glucocorticoid*  
132 *metabolite concentrations*

133 To investigate whether urinary OTM and GCM concentrations were affected by relationship  
134 strength and the time spent in body contact, we fitted two LMMs with Gaussian error structures  
135 (using log-transformed OTM and GCM concentrations as response variables). We included sex,  
136 fence, and the frequency of SDBs (z-transformed co-variate) as control factors. Basal OTM and  
137 GCM concentrations (i.e., OTM / GCM concentrations on resting days where no testing took  
138 place) were included as co-variates to control for individual variation in unstimulated OT/GC  
139 system activity. Random effects of subject and partner identity, and plate were included.

140

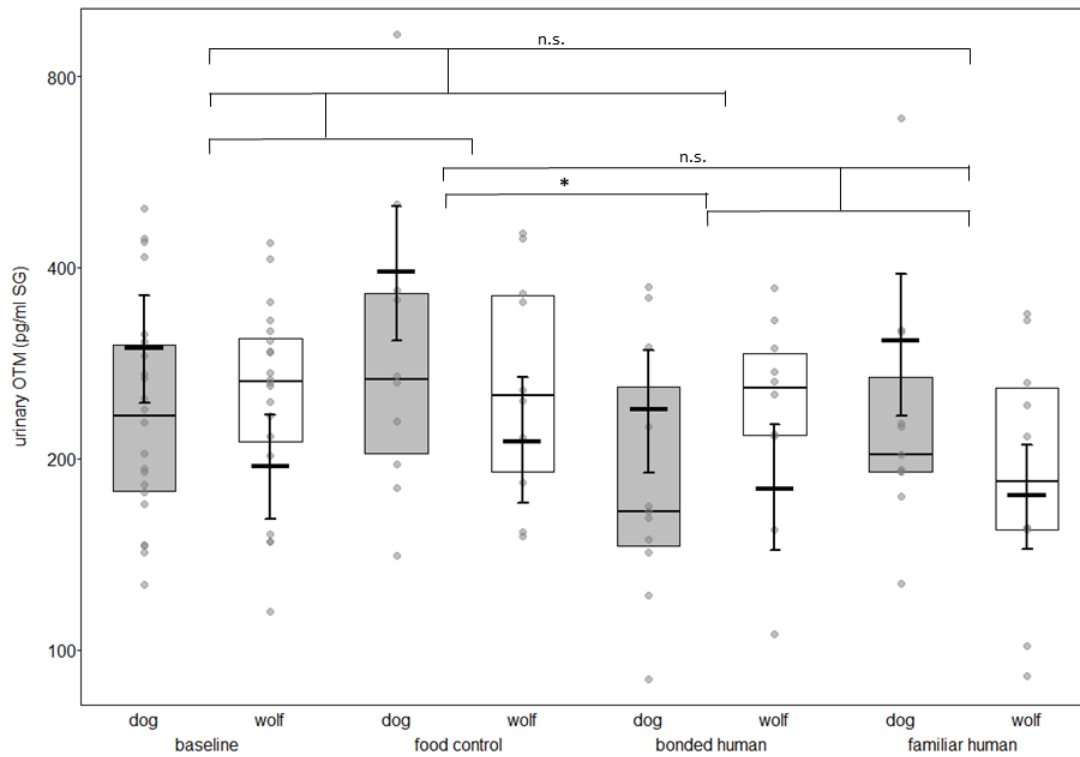

141  
 142 **Fig.S1:** Urinary OTM concentrations (pg/ml SG) across all four conditions in pack-living dogs  
 143 (N=11; grey boxes) and wolves (N=10; white boxes). Indicated are medians and quartiles (thin  
 144 horizontal lines with boxes) as well as the fitted model and its 95% confidence intervals (thick  
 145 horizontal lines with error bars). \*  $P \leq 0.05$ .  
 146  
 147

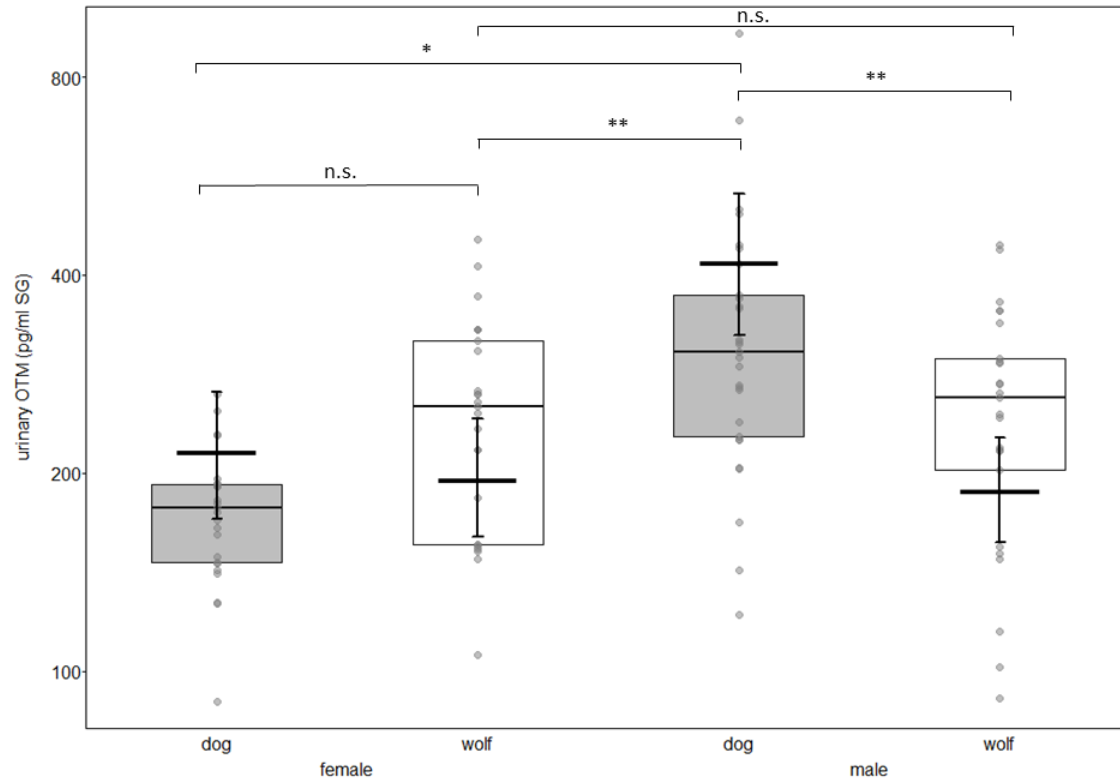

148  
 149 **Fig. S2:** Effect of sex on urinary OTM concentrations in dogs (N=11; grey boxes) and wolves  
 150 (N=10; white boxes). Indicated are medians and quartiles (thin horizontal lines with boxes) as  
 151 well as the fitted model and its 95% confidence intervals (thick horizontal lines with error bars).  
 152 \*\*  $P \leq 0.01$ , \*  $P \leq 0.05$ .

153  
 154

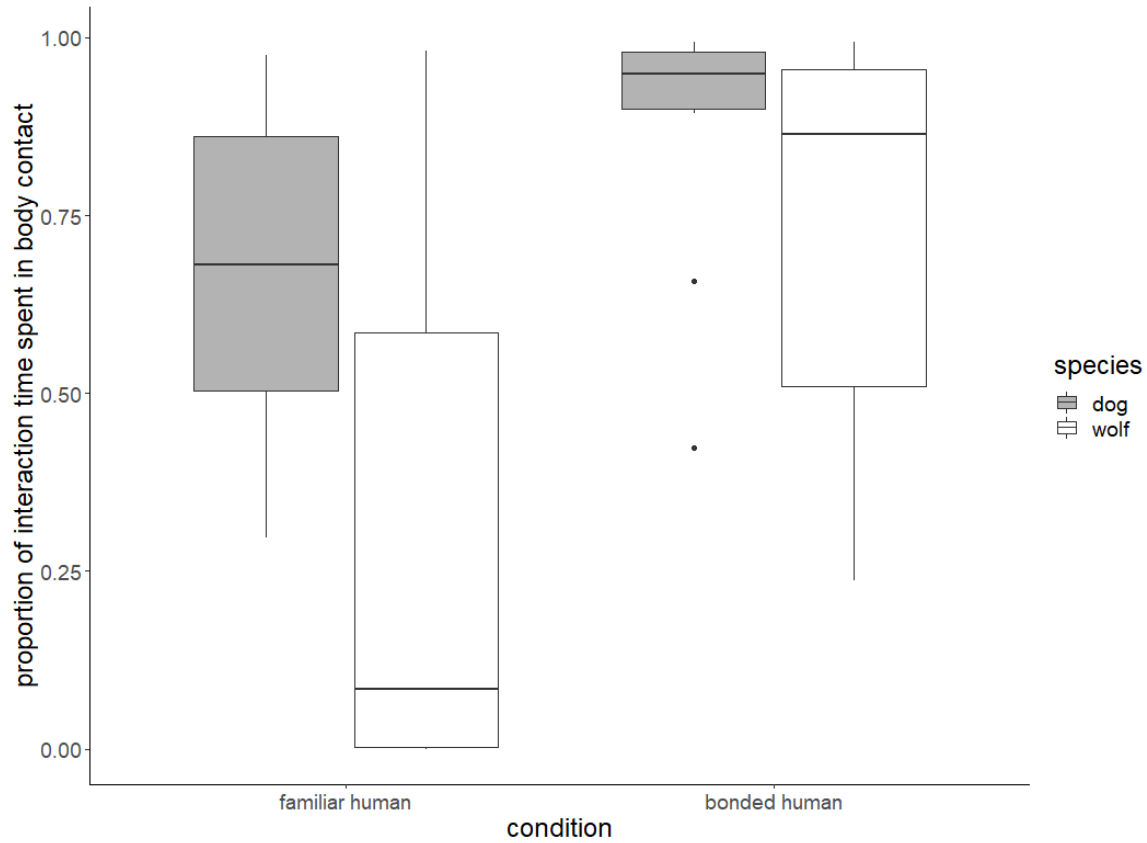

155  
 156 **Fig. S3:** Proportion of interaction time spent in body contact with the human partner, mediated  
 157 by condition (i.e., relationship strength: ‘familiar’, ‘bonded’) and species (grey = dog, white =  
 158 wolf). Indicated are medians and quartiles (thin horizontal lines and boxes).  
 159  
 160  
 161  
 162  
 163  
 164  
 165  
 166  
 167  
 168  
 169  
 170  
 171  
 172  
 173  
 174  
 175  
 176  
 177  
 178

179

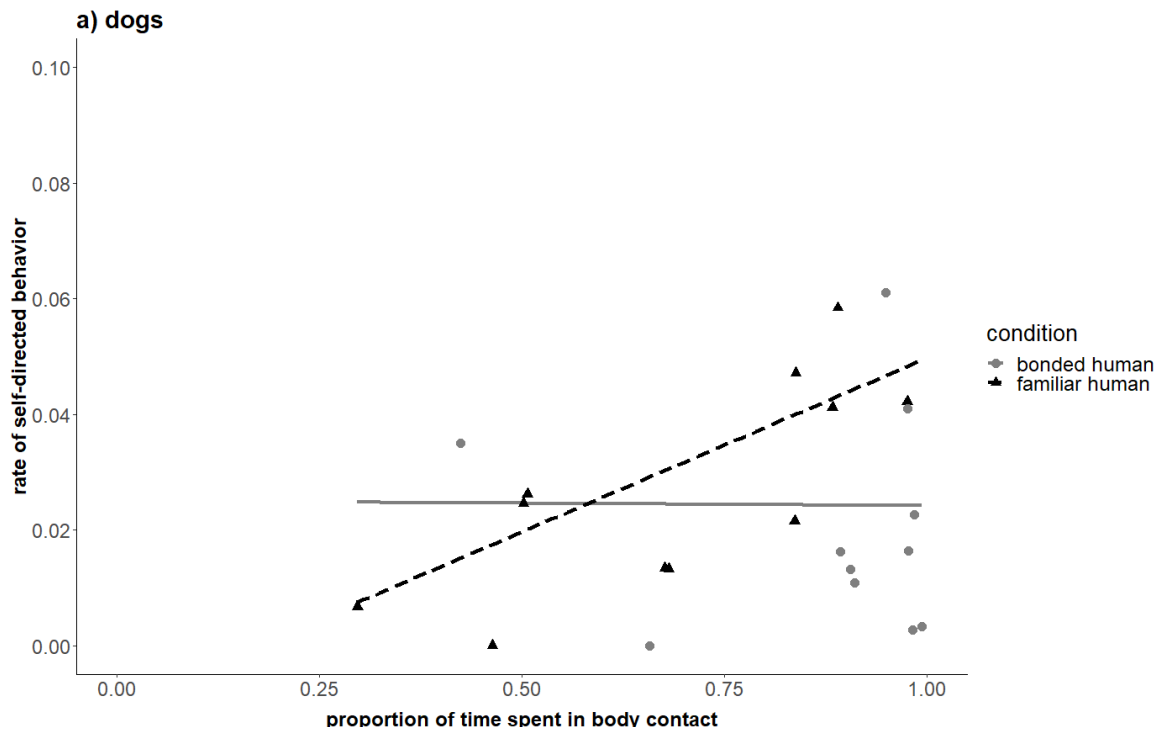

180

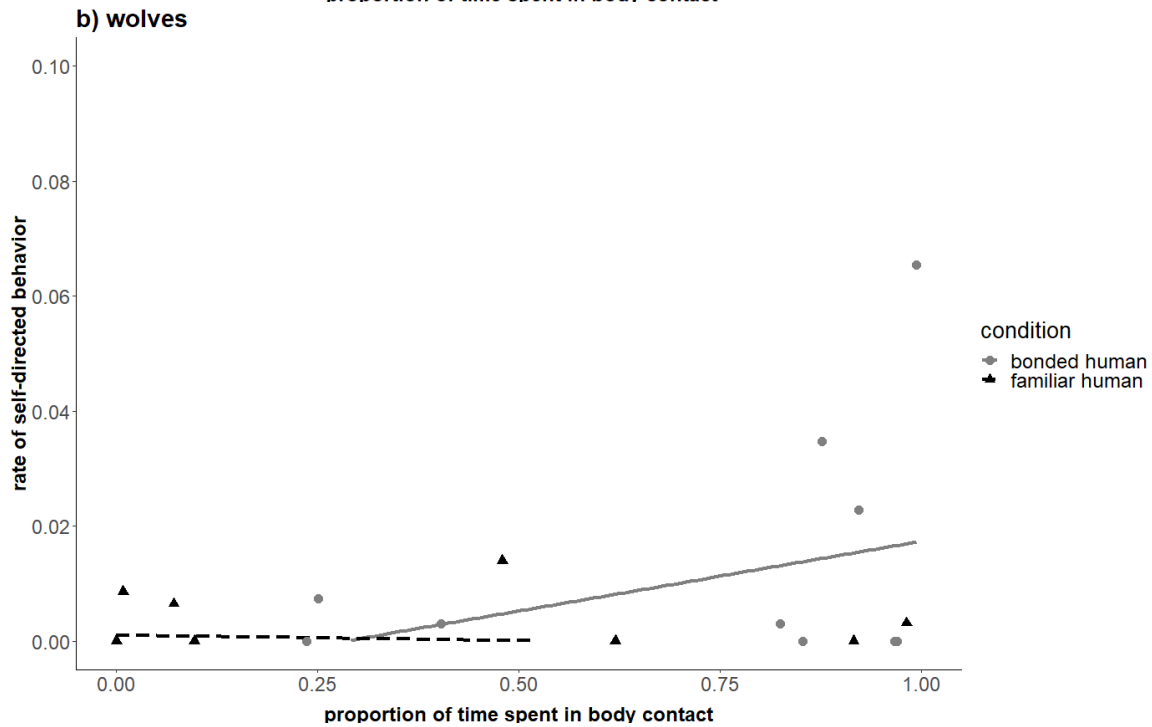

181

182

183 **Fig. S4 a - b:** Association between rate of self-directed behavior per second of interaction time

184 and proportion of interaction time spent in body contact, by species (a = dogs; b = wolves) and

185 relationship strength of the interaction partner (bonded = grey dots, solid line; familiar = black

186 triangles; dotted line).

187



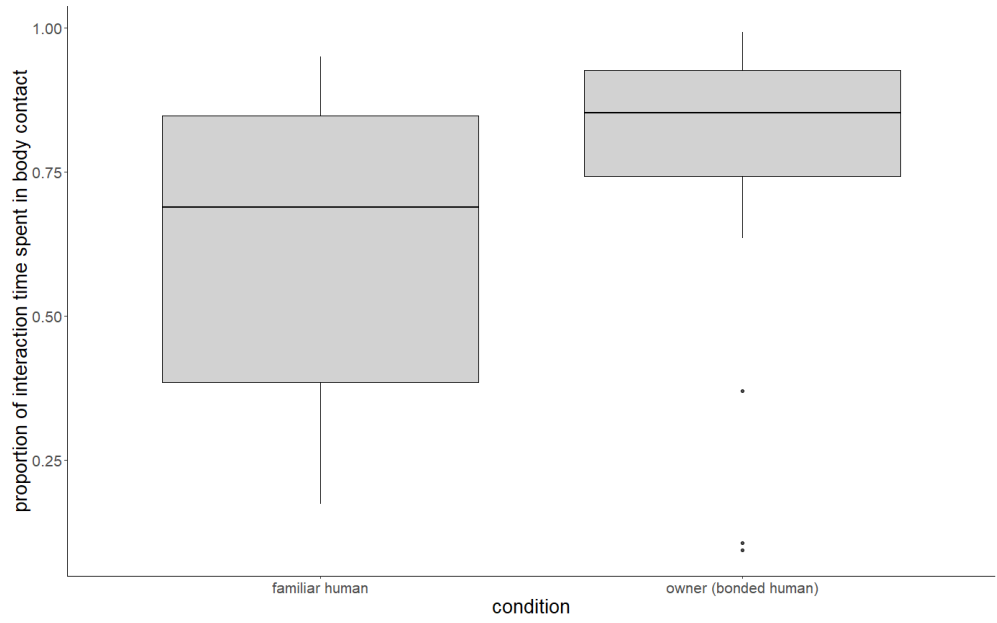

188  
189  
190  
191  
192  
193

**Fig. S5:** Proportion of interaction time spent in body contact with the human partners, mediated by condition (i.e., relationship strength, familiar and bonded/owner) in pet dogs. Indicated are medians and quartiles (thin horizontal lines and boxes).

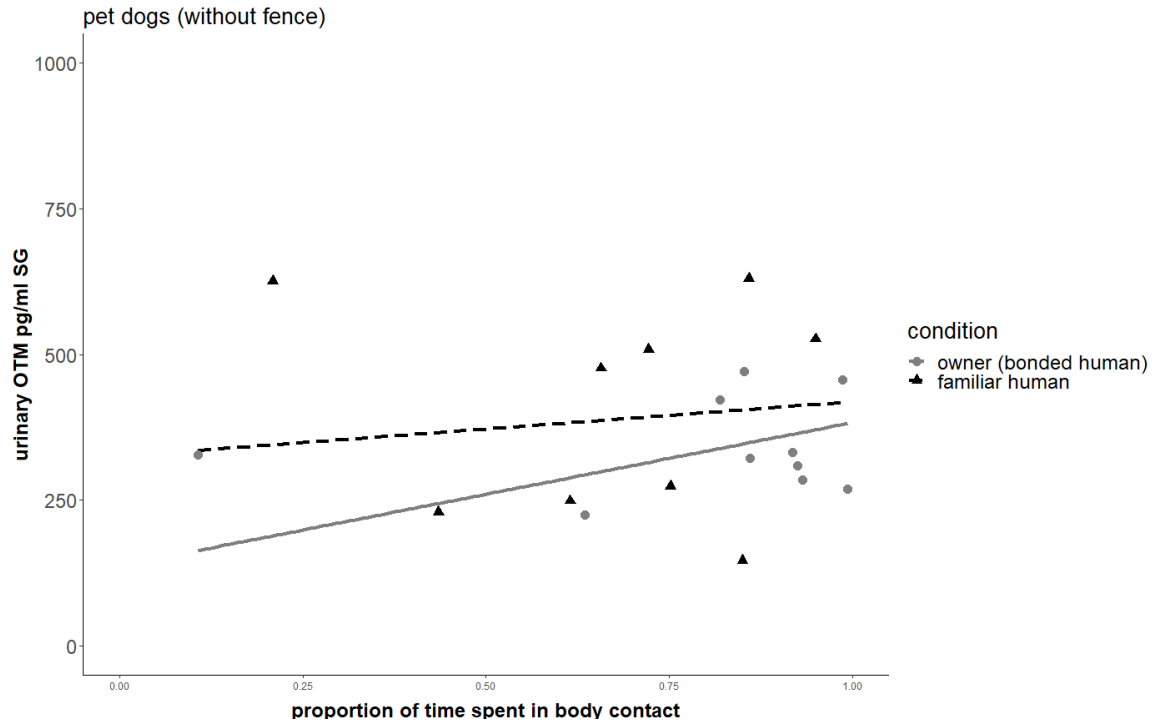

194  
195

196 **Fig. S6:** Association between urinary OTM (pg/ml SG) concentrations, proportion of interaction  
197 time spent in body contact, and condition (i.e., relationship strength of the interaction partner:  
198 owner/bonded = grey dots, solid line; familiar = black triangles; dotted line) in **pet dogs** (N=10;  
199 data points shown of 9 pet dogs in 'familiar' condition due to unavailability of one dog for  
200 further tests; data points shown of all pet dogs in 'owner/bonded' condition) without a fence  
201 present between the dogs and the human interaction partners.  
202

203 **Table S1:** Details of the pack-living dogs and wolves used in Experiment 1.  
 204

| <b>Animal ID</b> | <b>Species</b> | <b>Sex</b> | <b>Age (at study begin; in years)</b> |
|------------------|----------------|------------|---------------------------------------|
| Amarok           | Wolf           | Male       | 5                                     |
| Aragorn          | Wolf           | Male       | 9                                     |
| Tekoa            | Wolf           | Male       | 2                                     |
| Geronimo         | Wolf           | Male       | 8                                     |
| Nanuk            | Wolf           | Male       | 9                                     |
| Tala             | Wolf           | Female     | 5                                     |
| Yukon            | Wolf           | Female     | 8                                     |
| Shima            | Wolf           | Female     | 9                                     |
| Taima            | Wolf           | Female     | 2                                     |
| Una              | Wolf           | Female     | 5                                     |
| Meru             | Dog            | Male       | 7                                     |
| Maisha           | Dog            | Male       | 8                                     |
| Hiari            | Dog            | Male       | 3                                     |
| Enzi             | Dog            | Male       | 3                                     |
| Asali            | Dog            | Male       | 8                                     |
| Sahibu           | Dog            | Male       | 3                                     |
| Bora             | Dog            | Female     | 7                                     |
| Binti            | Dog            | Female     | 7                                     |
| Panya            | Dog            | Female     | 3                                     |
| Imara            | Dog            | Female     | 3                                     |
| Nia              | Dog            | Female     | 6                                     |

205  
 206  
 207  
 208  
 209  
 210  
 211  
 212  
 213  
 214  
 215  
 216  
 217  
 218  
 219  
 220  
 221  
 222  
 223  
 224  
 225

226 **Table S2:** Relevant subset of the ethogram used for video coding and subsequent statistical  
227 analyses of behavioral correlates during the human-animal interaction tests.  
228

|                               |                                                                                                |
|-------------------------------|------------------------------------------------------------------------------------------------|
| OOS (duration)                | Out of sight; animal not visible on the video                                                  |
| Proximity to human (duration) | During interaction or training: subject is staying within one body length of the human partner |
| Yawning (event)               | Wide opening of the jaws, without vocalizing                                                   |
| Body / head shaking (event)   | Shaking the body or head from side to side                                                     |
| Lip licking (event)           | Briefly extruding the tongue from the mouth and running it over the animal's own lips/nose     |
| Body contact (duration)       | Touching the animal in a gentle way, on the side of its body or head                           |

229  
230

231 **Table S3:** Full and reduced model outputs for urinary OTM (pg/ml SG; log transformed)  
 232 concentrations across all test conditions.  
 233

| <b>Full model</b>                                            | <b>Estimate</b> | <b>SE</b> | <b>Df</b> | $\chi^2$ | <b>P</b>     |                 |                 |
|--------------------------------------------------------------|-----------------|-----------|-----------|----------|--------------|-----------------|-----------------|
| <b>Predictor</b>                                             |                 |           |           |          |              | <b>Lower CI</b> | <b>Upper CI</b> |
| Intercept                                                    | 5.530           | 0.155     | NA*       | NA*      | NA*          |                 |                 |
| Species <sup>†</sup>                                         | 0.079           | 0.191     | NA*       | NA*      | NA*          |                 |                 |
| Food control condition <sup>‡</sup>                          | 0.499           | 0.106     | NA*       | NA*      | NA*          |                 |                 |
| Familiar human condition <sup>‡</sup>                        | 0.252           | 0.136     | NA*       | NA*      | NA*          |                 |                 |
| Baseline condition <sup>‡</sup>                              | 0.220           | 0.094     | NA*       | NA*      | NA*          |                 |                 |
| Sex <sup>§</sup>                                             | 0.662           | 0.139     | 1         | NA*      | NA*          |                 |                 |
| Feeding status <sup>¶</sup>                                  | -0.597          | 0.096     | 1         | 12.513   | <b>0.000</b> |                 |                 |
| Reproductive phase <sup>#</sup>                              | -0.014          | 0.078     | 1         | 0.017    | 0.895        |                 |                 |
| Species <sup>†</sup> : Food control condition <sup>‡</sup>   | -0.327          | 0.143     | 3         | 4.650    | 0.199        |                 |                 |
| Species <sup>†</sup> : Familiar human condition <sup>‡</sup> | -0.276          | 0.186     | NA*       | NA*      | NA*          |                 |                 |
| Species <sup>†</sup> : Baseline condition <sup>‡</sup>       | -0.139          | 0.133     | NA*       | NA*      | NA*          |                 |                 |
| Species <sup>†</sup> : Sex <sup>§</sup>                      | -0.703          | 0.185     | 1         | 9.029    | <b>0.003</b> |                 |                 |
| <b>Reduced model</b>                                         | <b>Estimate</b> | <b>SE</b> | <b>Df</b> | $\chi^2$ | <b>P</b>     | <b>Lower CI</b> | <b>Upper CI</b> |
| <b>Predictor</b>                                             |                 |           |           |          |              |                 |                 |
| (Intercept)                                                  | 5.651           | 0.148     | NA*       | NA*      | NA*          | 5.314           | 5.981           |
| Species <sup>†</sup> : Sex <sup>§</sup>                      | -0.724          | 0.188     | 1         | 6.926    | <b>0.008</b> | -1.166          | -0.255          |
| Food control condition <sup>‡</sup>                          | 0.332           | 0.085     | 3         | 8.605    | <b>0.035</b> | 0.151           | 0.514           |
| Familiar human condition <sup>‡</sup>                        | 0.131           | 0.114     | NA*       | NA*      | NA*          | -0.121          | 0.369           |
| Baseline condition <sup>‡</sup>                              | 0.157           | 0.073     | NA*       | NA*      | NA*          | -0.005          | 0.322           |
| Reproductive phase <sup>#</sup>                              | -0.033          | 0.080     | 1         | 0.092    | 0.762        | -0.246          | 0.166           |
| Feeding status <sup>¶</sup>                                  | -0.619          | 0.104     | 1         | 11.588   | <b>0.001</b> | -0.850          | -0.407          |

234 Statistically significant results ( $P \leq 0.05$ ) appear in bold. SE, standard error. Df, degrees of  
 235 freedom. CI, confidence interval. \* Not shown because of limited interpretation only.

236 <sup>†, ‡, §, ¶, #</sup>  $\chi^2$  and P values refer to comparison with the test predictors' reference levels:

237 <sup>†</sup> Reference level 'dog'.

238 <sup>‡</sup> Reference level 'bonded human condition'.

239 <sup>§</sup> Reference level 'female'.

240 <sup>¶</sup> Reference level 'not fed/fasted'.

241 <sup>#</sup> Reference level 'anestrus'.

242

243

244 **Table S4:** Full and reduced model outputs for time spent in body contact (as proportion of  
 245 interaction time) during social interaction tests.  
 246

| <b>Full model</b>                                         | <b>Estimate</b> | <b>SE</b> | <b>Df</b> | <b><math>\chi^2</math></b> | <b>P</b>     |                 |                 |
|-----------------------------------------------------------|-----------------|-----------|-----------|----------------------------|--------------|-----------------|-----------------|
| <b>Predictor</b>                                          |                 |           |           |                            |              |                 |                 |
| Intercept                                                 | 2.154           | 0.701     | NA*       | NA*                        | NA*          |                 |                 |
| Species <sup>†</sup>                                      | -0.859          | 0.912     | NA*       | NA*                        | NA*          |                 |                 |
| Relationship strength <sup>‡</sup>                        | -1.442          | 0.623     | NA*       | NA*                        | NA*          |                 |                 |
| Sex <sup>§</sup>                                          | 0.114           | 0.450     | 1         | 0.066                      | 0.798        |                 |                 |
| Species <sup>†</sup> : Relationship strength <sup>‡</sup> | -1.180          | 0.859     | 1         | 1.663                      | 0.197        |                 |                 |
| <b>Reduced model</b>                                      | <b>Estimate</b> | <b>SE</b> | <b>Df</b> | <b><math>\chi^2</math></b> | <b>P</b>     | <b>Lower CI</b> | <b>Upper CI</b> |
| <b>Predictor</b>                                          |                 |           |           |                            |              |                 |                 |
| (Intercept)                                               | 2.506           | 0.659     | NA*       | NA*                        | NA*          | 1.283           | 3.766           |
| Species <sup>†</sup>                                      | -1.483          | 0.784     | 1         | 3.169                      | 0.075        | -2.918          | -0.054          |
| Relationship strength <sup>‡</sup>                        | -2.066          | 0.483     | 1         | 12.818                     | <b>0.000</b> | -3.019          | -1.157          |
| Sex <sup>§</sup>                                          | 0.105           | 0.458     | 1         | 0.054                      | 0.817        | -0.803          | 1.006           |

247 Statistically significant results ( $P \leq 0.05$ ) appear in bold. SE, standard error. Df, degrees of  
 248 freedom. CI, confidence interval. \* Not shown because of limited interpretation only.

249 <sup>†, ‡, §</sup>  $\chi^2$  and P values refer to comparison with the test predictors' reference levels:

250 <sup>†</sup> Reference level 'dog'.

251 <sup>‡</sup> Reference level 'bonded'.

252 <sup>§</sup> Reference level 'female'.

253

254

255

256 **Table S5:** Full model output for rate of self-directed behaviors during social interaction tests.

| Full model                                                                            | Estimat | SE    | Df  | $\chi^2$ | P            | Lower CI | Upper CI |
|---------------------------------------------------------------------------------------|---------|-------|-----|----------|--------------|----------|----------|
| Predictor                                                                             | e       |       |     |          |              |          |          |
| Intercept                                                                             | -3.293  | 1.490 | NA* | NA*      | NA*          | -6.980   | -0.588   |
| Species <sup>†</sup>                                                                  | -3.616  | 2.013 | NA* | NA*      | NA*          | -10.411  | 0.516    |
| Relationship strength <sup>‡</sup>                                                    | -2.250  | 1.517 | NA* | NA*      | NA*          | -5.106   | 0.808    |
| Body contact <sup>¶</sup>                                                             | -1.007  | 1.687 | NA* | NA*      | NA*          | -4.175   | 2.656    |
| Sex <sup>§</sup>                                                                      | 0.191   | 0.468 | 1   | 0.173    | 0.677        | -0.593   | 1.069    |
| Species <sup>†</sup> : Relationship strength <sup>‡</sup>                             | 3.630   | 2.073 | NA* | NA*      | NA*          | -0.869   | 10.398   |
| Species <sup>†</sup> : Body contact <sup>¶</sup>                                      | 3.270   | 2.362 | NA* | NA*      | NA*          | -1.355   | 10.769   |
| Relationship strength <sup>‡</sup> : Body contact <sup>¶</sup>                        | 3.338   | 1.782 | NA* | NA*      | NA*          | -0.035   | 6.835    |
| Species <sup>†</sup> : Relationship strength <sup>‡</sup> : Body contact <sup>¶</sup> | -6.496  | 2.701 | 1   | 4.935    | <b>0.026</b> | -17.721  | -1.737   |

257 Statistically significant results ( $P \leq 0.05$ ) appear in bold. SE, standard error. Df, degrees of  
 258 freedom. CI, confidence interval. \* Not shown because of limited interpretation only.

259 <sup>†, ‡, §</sup>  $\chi^2$  and P values refer to comparison with the test predictors' reference levels:

260 <sup>†</sup> Reference level 'dog'.

261 <sup>‡</sup> Reference level 'bonded'.

262 <sup>§</sup> Reference level 'female'.

263 <sup>¶</sup> Normalized duration (z-transformed).

264

265

266

267 **Table S6:** Full and reduced model outputs for urinary OTM (pg/ml SG; log transformed)  
 268 concentrations for social interaction tests.

| <b>Full model</b>                                                                     | <b>Estimate</b> | <b>SE</b> | <b>Df</b> | $\chi^2$ | <b>P</b>     |                 |                 |
|---------------------------------------------------------------------------------------|-----------------|-----------|-----------|----------|--------------|-----------------|-----------------|
| <b>Predictor</b>                                                                      |                 |           |           |          |              | <b>Lower CI</b> | <b>Upper CI</b> |
| Intercept                                                                             | 4.270           | 0.537     | NA*       | NA*      | NA*          |                 |                 |
| Species <sup>†</sup>                                                                  | 0.182           | 0.613     | NA*       | NA*      | NA*          |                 |                 |
| Sex <sup>§</sup>                                                                      | 0.508           | 0.202     | NA*       | NA*      | NA*          |                 |                 |
| SDB rate <sup>¶</sup>                                                                 | -8.170          | 3.574     | 1         | 4.007    | <b>0.045</b> |                 |                 |
| Body contact <sup>#</sup>                                                             | -0.097          | 0.549     | NA*       | NA*      | NA*          |                 |                 |
| Relationship strength <sup>‡</sup>                                                    | 0.362           | 0.566     | NA*       | NA*      | NA*          |                 |                 |
| Feeding status <sup>¶</sup>                                                           | 0.305           | 0.133     | 1         | 4.196    | <b>0.041</b> |                 |                 |
| Basal OTM concentration <sup>**</sup>                                                 | 0.036           | 0.070     | 1         | 0.251    | 0.616        |                 |                 |
| GCM concentration <sup>††</sup>                                                       | 0.030           | 0.063     | 1         | 0.216    | 0.642        |                 |                 |
| Species <sup>†</sup> : Sex <sup>§</sup>                                               | -0.725          | 0.267     | 1         | 6.705    | <b>0.010</b> |                 |                 |
| Species <sup>†</sup> : Body contact <sup>#</sup>                                      | 0.465           | 0.635     | 1         | 0.192    | 0.661        |                 |                 |
| Species <sup>†</sup> : Relationship strength <sup>‡</sup>                             | -0.013          | 0.632     | 1         | 1.988    | 0.159        |                 |                 |
| Body contact <sup>#</sup> : Relationship strength <sup>‡</sup>                        | 0.219           | 0.696     | 1         | 0.186    | 0.667        |                 |                 |
| Species <sup>†</sup> : Relationship strength <sup>‡</sup> : Body contact <sup>#</sup> | -0.501          | 0.837     | 1         | 0.330    | 0.565        |                 |                 |
| <b>Reduced model</b>                                                                  | <b>Estimate</b> | <b>SE</b> | <b>Df</b> | $\chi^2$ | <b>P</b>     | <b>Lower CI</b> | <b>Upper CI</b> |
| <b>Predictor</b>                                                                      |                 |           |           |          |              |                 |                 |
| Intercept                                                                             | 4.031           | 0.299     | NA*       | NA*      | NA*          | 3.263           | 4.847           |
| Body contact <sup>#</sup>                                                             | 0.224           | 0.199     | 1         | 0.836    | 0.361        | -0.332          | 0.816           |
| Relationship strength <sup>‡</sup>                                                    | 0.417           | 0.118     | 1         | 5.463    | <b>0.019</b> | 0.130           | 0.721           |
| Basal OTM concentration <sup>**</sup>                                                 | 0.037           | 0.070     | 1         | 0.244    | 0.621        | -0.152          | 0.209           |
| GCM concentration <sup>††</sup>                                                       | 0.017           | 0.063     | 1         | 0.066    | 0.798        | -0.145          | 0.173           |
| Species <sup>†</sup> : Sex <sup>§</sup>                                               | -0.778          | 0.276     | 1         | 7.033    | <b>0.008</b> | -1.413          | -0.065          |
| SDB rate <sup>¶</sup>                                                                 | -6.202          | 3.259     | 1         | 2.980    | 0.084        | -15.266         | 2.290           |
| Feeding status <sup>¶</sup>                                                           | 0.288           | 0.143     | 1         | 2.701    | 0.100        | -0.060          | 0.619           |

269 Statistically significant results ( $P \leq 0.05$ ) appear in bold. SE, standard error. Df, degrees of  
 270 freedom. CI, confidence interval. \* Not shown because of limited interpretation only.

271 †, ‡, §, ¶, ¶  $\chi^2$  and P values refer to comparison with the test predictors' reference levels:

272 † Reference level 'dog'.

273 ‡ Reference level 'bonded'.

274 § Reference level 'female'.

275 ¶ Reference level 'not fed/fasted'.

276 # Normalized duration (z-transformed).

277 ¶ Normalized for time visible on camera (z-transformed).

278 \*\* Urinary OTM (pg/ml SG) concentration on non-testing days ('baseline'; z-transformed).



279 †† Urinary GCM (ng/ml SG) concentration (following social interaction test; z-transformed).  
280

281 **Table S7:** Full and reduced model outputs for urinary GCM (ng/ml SG; log transformed)  
 282 concentrations for social interaction tests.

| <b>Full model</b>                                                                     | <b>Estimate</b> | <b>SE</b> | <b>Df</b> | $\chi^2$ | <b>P</b>     |                 |                 |
|---------------------------------------------------------------------------------------|-----------------|-----------|-----------|----------|--------------|-----------------|-----------------|
| <b>Predictor</b>                                                                      |                 |           |           |          |              | <b>Lower CI</b> | <b>Upper CI</b> |
| Intercept                                                                             | 2.330           | 0.424     | NA*       | NA*      | NA*          |                 |                 |
| Species <sup>†</sup>                                                                  | -0.509          | 0.477     | NA*       | NA*      | NA*          |                 |                 |
| Sex <sup>§</sup>                                                                      | -0.060          | 0.156     | NA*       | NA*      | NA*          |                 |                 |
| SDB rate <sup>  </sup>                                                                | 3.882           | 2.698     | 1         | 1.337    | 0.247        |                 |                 |
| Body contact <sup>#</sup>                                                             | -0.312          | 0.443     | NA*       | NA*      | NA*          |                 |                 |
| Relationship strength <sup>‡</sup>                                                    | -0.232          | 0.412     | NA*       | NA*      | NA*          |                 |                 |
| Feeding status <sup>  </sup>                                                          | -0.443          | 0.107     | 1         | 11.615   | <b>0.001</b> |                 |                 |
| Reproductive phase <sup>††</sup>                                                      | 0.089           | 0.112     | 1         | 0.532    | 0.466        |                 |                 |
| Basal GCM concentration <sup>**</sup>                                                 | 0.324           | 0.053     | 1         | 16.386   | <b>0.000</b> |                 |                 |
| Species <sup>†</sup> : Sex <sup>§</sup>                                               | 0.154           | 0.232     | 1         | 0.421    | 0.517        |                 |                 |
| Species <sup>†</sup> : Body contact <sup>#</sup>                                      | -0.245          | 0.523     | 1         | 1.051    | 0.305        |                 |                 |
| Species <sup>†</sup> : Relationship strength <sup>‡</sup>                             | -0.412          | 0.468     | 1         | 3.582    | 0.058        |                 |                 |
| Species <sup>†</sup> : Relationship strength <sup>‡</sup> : Body contact <sup>#</sup> | 1.206           | 0.620     | 1         | 2.438    | 0.118        |                 |                 |
| <b>Reduced model</b>                                                                  | <b>Estimate</b> | <b>SE</b> | <b>Df</b> | $\chi^2$ | <b>P</b>     | <b>Lower CI</b> | <b>Upper CI</b> |
| <b>Predictor</b>                                                                      |                 |           |           |          |              |                 |                 |
| Intercept                                                                             | 2.272           | 0.255     | NA*       | NA*      | NA*          | 1.776           | 2.821           |
| Body contact <sup>#</sup> : Relationship strength <sup>‡</sup>                        | 0.797           | 0.278     | 1         | 5.969    | <b>0.015</b> | 0.175           | 1.376           |
| Species <sup>†</sup>                                                                  | -0.504          | 0.142     | 1         | 10.018   | <b>0.002</b> | -0.819          | -0.230          |
| Basal GCM concentration <sup>**</sup>                                                 | 0.307           | 0.051     | 1         | 16.432   | <b>0.000</b> | 0.193           | 0.422           |
| Reproductive phase <sup>††</sup>                                                      | 0.060           | 0.116     | 1         | 0.221    | 0.638        | -0.186          | 0.324           |
| Sex <sup>§</sup>                                                                      | 0.049           | 0.112     | 1         | 0.189    | 0.664        | -0.156          | 0.262           |
| SDB rate <sup>  </sup>                                                                | -0.415          | 2.590     | 1         | 0.025    | 0.875        | -6.538          | 4.739           |
| Feeding status <sup>  </sup>                                                          | -0.407          | 0.128     | 1         | 7.855    | <b>0.005</b> | -0.665          | -0.150          |

283 Statistically significant results ( $P \leq 0.05$ ) appear in bold. SE, standard error. Df, degrees of  
 284 freedom. CI, confidence interval. \* Not shown because of limited interpretation only.

285 †, ‡, §, ¶, ††  $\chi^2$  and P values refer to comparison with the test predictors' reference levels:

286 † Reference level 'dog'.

287 ‡ Reference level 'bonded'.

288 § Reference level 'female'.

289 ¶ Reference level 'not fed/fasted'.

290 †† Reference level 'anestrus'.

291 # Normalized duration (z-transformed).

292 || Normalized for time visible on camera (z-transformed).

293 \*\* Urinary GCM (ng/ml SG) concentration on non-testing days ('baseline'; z-transformed).

294

295

296 **Table S8:** Details of the pet dogs used in Experiment 2.  
297

| <b>Dog ID</b> | <b>Breed</b>     | <b>Sex</b>       | <b>Age (at study begin; in years)</b> |
|---------------|------------------|------------------|---------------------------------------|
| Coco          | Border Collie    | Female           | 2                                     |
| Miley         | Border Collie    | Female           | 9                                     |
| Casey         | Chihuahua        | Female (spayed)  | 8                                     |
| Leni          | Mix              | Female (spayed)  | 5                                     |
| Olive         | Mix              | Female (spayed)  | 12                                    |
| Orion         | Mix              | Male             | 1                                     |
| Pepeo         | Mix              | Male             | 5                                     |
| Mago          | Golden Retriever | Male             | 14                                    |
| Frodo         | Mix              | Male (castrated) | 5                                     |
| Hakima        | Mix              | Male (castrated) | 8                                     |

298  
299

300 **Table S9:** Full model output for urinary OTM (pg/ml SG; log transformed) concentrations for  
 301 social interaction tests in pet dogs.  
 302

| <b>Full model</b>                                                 |                 |           |           |                            |              |                 |                 |
|-------------------------------------------------------------------|-----------------|-----------|-----------|----------------------------|--------------|-----------------|-----------------|
| <b>Predictor</b>                                                  | <b>Estimate</b> | <b>SE</b> | <b>Df</b> | <b><math>\chi^2</math></b> | <b>P</b>     | <b>Lower CI</b> | <b>Upper CI</b> |
| Intercept                                                         | 5.873           | 0.179     | NA*       | NA*                        | NA*          | 5.455           | 6.224           |
| Body contact <sup>#</sup> :<br>Relationship strength <sup>‡</sup> | 0.797           | 0.337     | 1         | 5.138                      | <b>0.023</b> | -0.033          | 1.582           |
| Basal OTM<br>concentration <sup>**</sup>                          | 0.217           | 0.085     | 1         | 5.530                      | <b>0.019</b> | 0.029           | 0.396           |
| Sex female <sup>§</sup>                                           | -0.095          | 0.187     | 2         | 4.529                      | 0.842        | -0.506          | 0.350           |
| Sex male <sup>§</sup>                                             | 0.218           | 0.157     | 2         | 4.529                      | 0.629        | -0.113          | 0.587           |
| Fence <sup>¶</sup>                                                | -0.283          | 0.119     | 1         | 4.716                      | <b>0.030</b> | -0.534          | -0.025          |
| SDB rate <sup>  </sup>                                            | 1.179           | 2.709     | 1         | 0.172                      | 0.678        | -4.628          | 7.235           |

303 Statistically significant results ( $P \leq 0.05$ ) appear in bold. SE, standard error. Df, degrees of  
 304 freedom. CI, confidence interval. \* Not shown because of limited interpretation only.  
 305 ‡, ¶  $\chi^2$  and P values refer to comparison with the test predictors' reference levels:  
 306 ‡ Reference level 'familiar'.  
 307 ¶ Reference level 'fence present'.  
 308 § Reference level 'castrated/spayed';  
 309 P values for each level of the factor 'sex' were obtained from post hoc pairwise comparisons (R  
 310 function lsmeans).  
 311 # Normalized duration (z-transformed).  
 312 || Normalized for time visible on camera (z-transformed).  
 313 \*\* Urinary OTM (pg/ml SG) concentration on non-testing days ('baseline'; z-transformed).  
 314  
 315

316 **Movie S1.** Dyadic social interaction test with a hand-raised, pack-living wolf.

317

318 **Movie S2.** Dyadic social interaction test with a hand-raised, pack-living dog.

319

320 **Movie S3.** Dyadic social interaction test with a pet dog.

321

322 **Dataset S1.** Data collected from pack-living dogs and wolves.

323 **Dataset S2.** Data collected from human participants.

324 **Dataset S3.** Data collected from pet dogs.

325
